# Supplementary material for: Hepatoprotective Effect of Quercetin on Endoplasmic Reticulum Stress and Inflammation after Intense Exercise in Mice through Phosphoinositide 3‐Kinase and Nuclear Factor‐Kappa B
Source: Hindawi journal article supplement (doi:10.1155/2016/8696587), 2016-01-01
Supplement: f1 [file 8696587.f1.pdf]

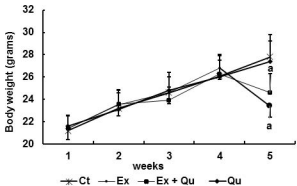

Supplementary Fig 1
